# Supplementary material
Source: PubMed Central journal article supplement (PMC2680612)
Supplement: NIHMS77667-supplement-01.pdf [file NIHMS77667-supplement-01.pdf]

gil45421834\_Oryza\_sativa - - - T V A A S R R L P V G V R K P P L R V V V T G G A G F V G S H L V D E L L A - R G D S V I V 1 1 3  
 gil25396402\_Oryza\_sativa S F A S H T S S A S G V P P G F R P P P R R V V V T G G A G F V G S H L V D R L L E - Q G D S V I V 1 2 9  
 gil45421832\_Oryza\_sativa A A S L H E S A G G K V P L G L R R R A L R V L V T G G A G F V G S H L V D R L V E - R G D S V I V 1 4 1  
 gil13591616\_Pisum\_sativum - - - - - - - - - - - - - - - - K F F Q S N M R I L V T G G A G F I G S H L V D R L M Q N E K N E V I V 6 2  
 gil15237853\_Arabidopsis\_thalia - - - - - - - - - - - - - - - - K F C Q P N M R I L I S G G A G F I G S H L V D K L M E N E K N E V I V 5 9  
 gil18447934\_Oryza\_sativa - - - - - - - - - - - - - - - - K F F Q A N L R I L V T G G A G F I G S H L V D K L M E N E K H E V I V 6 4  
 gil14318327\_Filobasidiella\_neo - - - T V N K F P P V K L L P N H E R K R I L V T G G A G F V G S H L V D R L M L - L G H E V T V 1 1 6  
 gil21356223\_Drosophila\_melanog - - - S T P R K Y P K V K Y L N Y K N R K R I L I T G G A G F V G S H L V D D L M V - Q G H E V I V 1 4 4  
 gil31208447\_Anopheles\_gambiae - - - R I P R K Y P D V T F L N Y K N R K R I L I T G G A G F V G S H L V D Y L M M - Q G H E V I V 2 2 3  
 gil21326465\_Rattus\_norvegicus - - - S F T Q K Y P P V K F L S E K D R K R I L I T G G A G F V G S H L T D K L M M - D G H D V S V 1 1 7  
 gil28076899\_Mus\_musculus - - - S F T Q K Y P P V K F L S E K D R K R I L I T G G A G F V G S H L T D K L M M - D G H E V T V 1 1 7  
 gil42516563\_Homo\_sapiens - - - S F T Q K Y P P V K F L S E K D R K R I L I T G G A G F V G S H L T D K L M M - D G H E V T V 1 1 7  
 gil27545233\_Danio\_riero - - L S F T Q K Y P P V K F L S E K D R K R I L I T G G A G F V G S H L T D K L M M - D G H E V T V 1 1 5  
 gil47226915\_Tetraodon\_nigrovir A L L V L S Q K Y P P V K F L S E K D R K R I L I T G G A G F V G S H L T D K L M M - D G H E V T V 1 2 3  
 gil17539532\_Caenorhabditis\_ele A P L P T T K S F P S V R Y R N E E T R K R I L I T G G A G F V G S H L V D K L M L - D G H E V I A 1 6 5  
 gil39581321\_Caenorhabditis\_bri V P L P T T K S F P S V R Y R N E E T R K R V L I T G G A G F V G S H L V D K L M L - D G H E V I A 1 5 4  
 gil16555376\_Escherichia\_coli - - - - - - - - - - - - - - - - R T R V L I L G V N G F I G N H L T E R L L R E D H Y E V Y G 3 4 5

\* : : : \* \* \* : \* \* \* : \* : \* :

gil45421834\_Oryza\_sativa V D N F F T G R K E N V A R H L A D P R F E L I R H D V - - - - - E P I L L E V D Q I Y H L A C 1 5 7  
 gil25396402\_Oryza\_sativa V D N F F T G R K D N V A H H L R N P R F E L L R H D V - - - - - V E P I L L E V D R I Y H L A C 1 7 3  
 gil45421832\_Oryza\_sativa V D N F F T G R K D N V A H H L A N P R F E V I R H D V - - - - - V E P I L L E V D Q I Y H L A C 1 8 5  
 gil13591616\_Pisum\_sativum A D N Y F T G S K D N L K K W I G H P R F E L I R H D V - - - - - T E P L M I E V D Q I Y H L A C 1 0 6  
 gil15237853\_Arabidopsis\_thalia A D N Y F T G S K E N L K K W I G H P R F E L I R H D V - - - - - T E P L L I E V D R I Y H L A C 1 0 3  
 gil18447934\_Oryza\_sativa A D N F F T G S K D N L K K W I G H P R F E L I R H D V - - - - - T Q P L L V E V D Q I Y H L A C 1 0 8  
 gil14318327\_Filobasidiella\_neo L D N F F T G S R T T V S H W I G H P N F E M V R H D V - - - - - V E P F L I E V D Q I Y H L A C 1 6 0  
 gil21356223\_Drosophila\_melanog V D N F F T G R K R N V E H W I G H E N F E L I H H D I - - - - - V N P L F I E I D E I Y H L A S 1 8 8  
 gil31208447\_Anopheles\_gambiae A D N F F T G R K R N V E H W I G H E N F E L I H H D I - - - - - V N P L F I E V D E I Y H L A S 2 6 7  
 gil21326465\_Rattus\_norvegicus V D N F F T G R K R N V E H W I G H E N F E L I N H D V - - - - - V E P L Y I E V D Q I Y H L A S 1 6 1  
 gil28076899\_Mus\_musculus V D N F F T G R K R N V E H W I G H E N F E L I N H D V - - - - - V E P L Y I E V D Q I Y H L A S 1 6 1  
 gil42516563\_Homo\_sapiens V D N F F T G R K R N V E H W I G H E N F E L I N H D V - - - - - V E P L Y I E V D Q I Y H L A S 1 6 1  
 gil27545233\_Danio\_riero V D N F F T G R K R N V E H W I G H E N F E L I N H D V - - - - - V E P L Y I E V D Q I Y H L A S 1 5 9  
 gil47226915\_Tetraodon\_nigrovir V D N F F T G R K R N V E H W I G H E N F E L I N H D V - - - - - V E P L Y I E V D Q I Y H L A S 1 6 7  
 gil17539532\_Caenorhabditis\_ele L D N Y F T G R K K N V E H W I G H P N F E M V H D V - - - - - V N P Y F V E V D Q I Y H L A S 2 0 9  
 gil39581321\_Caenorhabditis\_bri L D N Y F T G R K K N I E H W I G H P N F E M V H D V - - - - - V N P Y F V E V D Q I Y H L A S 1 9 8  
 gil16555376\_Escherichia\_coli L D - - - I G - S D A I S R F L N H P H F H F V E G D I S I H S E W I E Y H V K K C D V V L P L V A 3 9 1

\* \* : : : . . \* . . . \* : : : \* : \* : \* . .

gil45421834\_Oryza\_sativa P A S P V H Y K F N P I K T I K T N V M G T L N M L G L A K R V G A R F L L T S T S E V Y G D P L E 2 0 7  
 gil25396402\_Oryza\_sativa P A S P V H Y K Y N P I K T I K T N V M G T L N M L G L A K R I G A R F L L T S T S E V Y G D P L E 2 2 3  
 gil45421832\_Oryza\_sativa P A S P V H Y K Y N P I K T I K T N V V G T L N M L G L A K R I G A K F L L T S T S E V Y G D P L Q 2 3 5  
 gil13591616\_Pisum\_sativum P A S P I F Y K Y N P V K T I K T N V I G T L N M L G L A K R V G A R I L L T S T S E V Y G D P L E 1 5 6  
 gil15237853\_Arabidopsis\_thalia P A S P I F Y K Y N P V K T I K T N V I G T L N M L G L A K R V G A R I L L T S T S E V Y G D P L I 1 5 3  
 gil18447934\_Oryza\_sativa P A S P I F Y K H N P V K T I K T N V I G T L N M L G L A K R V G A R I L L T S T S E V Y G D P L E 1 5 8  
 gil14318327\_Filobasidiella\_neo P A S P P H Y Q I N A V K T L K T S F E G T L N M L G L A K R T G A R F L I T S T S E V Y G D P E E 2 1 0  
 gil21356223\_Drosophila\_melanog P A S P P H Y M Y N P V K T I K T N T M G T I N V L G L A K R V M A K V L I A S T S E V Y G D P T V 2 3 8  
 gil31208447\_Anopheles\_gambiae P A S P P H Y M Y N P V K T I K T N T L G T I N V L G L A K R V G A K V L I A S T S E V Y G D P D V 3 1 7  
 gil21326465\_Rattus\_norvegicus P A S P P N Y M Y N P I K T L K T N T I G T L N M L G L A K R V G A R L L L A S T S E V Y G D P E V 2 1 1  
 gil28076899\_Mus\_musculus P A S P P N Y M Y N P I K T L K T N T I G T L N M L G L A K R V G A R L L L A S T S E V Y G D P E V 2 1 1  
 gil42516563\_Homo\_sapiens P A S P P N Y M Y N P I K T L K T N T I G T L N M L G L A K R V G A R L L L A S T S E V Y G D P E V 2 1 1  
 gil27545233\_Danio\_riero P A S P P N Y M Y N P I K T L K T N T I G T L N M L G L A K R V G A R L L L A S T S E V Y G D P E V 2 0 9  
 gil47226915\_Tetraodon\_nigrovir P A S P P N Y M Y N P I K T L K T N T I G T L N M L G L A K R V G A R L L L A S T S E V Y G D P E E 2 1 7  
 gil17539532\_Caenorhabditis\_ele P A S P P H Y M Y N P V K T I K T N T L G T I N M L G L A K R V K A T V L L A S T S E V Y G D P E V 2 5 9  
 gil39581321\_Caenorhabditis\_bri P A S P P H Y M Y N P V K T I K T N T L G T I N M L G L A K R V K A T V L L A S T S E V Y G D P E V 2 4 8  
 gil16555376\_Escherichia\_coli I A T P I E Y T R N P L R V I K L D F E E N L R I I R Y C V K Y R K R I I F A P S T S E V Y G M C S D 4 4 1

\* : \* \* \* \* \* : : : : : . . . . . : : : : : \* \* \* \* \* \* \* \* \*

gil45421834\_Oryza\_sativa H P Q K E S Y W G H V N - P I G - V R S C Y D E G K R T A E T L T M D Y H R G G A G V E V R I A R I F 2 5 5  
 gil25396402\_Oryza\_sativa H P Q K E T Y W G H V N - P I G - V R S C Y D E G K R T A E T L T M D Y H R G G G V E V R I A R I F 2 7 1  
 gil45421832\_Oryza\_sativa H P Q V E T Y W G N V N - P I G - V R S C Y D E G K R T A E T L T M D Y H R G A N L E V R I A R I F 2 8 3  
 gil13591616\_Pisum\_sativum H P Q P E T Y W G N V N - P I G - V R S C Y D E G K R V A E T L M F D Y H R Q H G I E I R I A R I F 2 0 4  
 gil15237853\_Arabidopsis\_thalia H P Q P E S Y W G N V N - P I G - V R S C Y D E G K R V A E T L M F D Y H R Q H G I E I R I A R I F 2 0 1  
 gil18447934\_Oryza\_sativa H P Q T E A Y W G N V N - P I G - V R S C Y D E G K R V A E T L M F D Y H R Q H G I E I R I A R I F 2 0 6  
 gil14318327\_Filobasidiella\_neo H P Q R E D Y W G H V N - C I G - P R A C Y D E G K R V A E T L T Y G Y H R K D G V E V R I A R I F 2 5 8  
 gil21356223\_Drosophila\_melanog H P Q P E T Y W G H V N - P I G - P R A C Y D E G K R V S E T L S Y A Y A K Q E K V N V R V A R I F 2 8 6  
 gil31208447\_Anopheles\_gambiae H P Q P E T Y W G H V N - P I G - P R A C Y D E G K R V S E T L S Y A Y A K Q E K V N V R V A R I F 3 6 5  
 gil21326465\_Rattus\_norvegicus H P Q S E D Y W G H V N - P I G - P R A C Y D E G K R V A E T M C Y A Y M K Q E G V E V R V A R I F 2 5 9  
 gil28076899\_Mus\_musculus H P Q S E D Y W G H V N - P I G - P R A C Y D E G K R V A E T M C Y A Y M K Q E G V E V R V A R I F 2 5 9  
 gil42516563\_Homo\_sapiens H P Q S E D Y W G H V N - P I G - P R A C Y D E G K R V A E T M C Y A Y M K Q E G V E V R V A R I F 2 5 9  
 gil27545233\_Danio\_riero H P Q N E D Y W G H V N - P I G - P R A C Y D E G K R V A E T M C Y A Y M K Q E G V E V R V A R I F 2 5 7  
 gil47226915\_Tetraodon\_nigrovir H P Q N E E Y W G H V N - P I G - P R A C Y D E G K R V A E T M C Y A Y M K Q E G V E V R V A R I F 2 6 5  
 gil17539532\_Caenorhabditis\_ele H P Q P E T Y W G H V N - T I G - P R A C Y D E G K R V A E S L M V A Y N K Q E N V K I R I A R I F 3 0 7  
 gil39581321\_Caenorhabditis\_bri H P Q P E T Y W G H V N - T I G - P R A C Y D E G K R V A E S L M V A Y N K Q E N V K I R I A R I F 2 9 6  
 gil16555376\_Escherichia\_coli K Y F D E D H S N L I V G P V N K P R W I Y S V S K Q L L D R V I W A Y G E K E G L Q F T L F R P F 4 9 1

: \* : . : . : . \* \* . \* : : : \* . . : : . : \* . . : : . : \* \*



**Supplemental Figure 1.** Sequence alignment of UDP-Glucuronic acid decarboxylases and ArnA decarboxylase domain (gil16555376\_Escherichia\_coli). Strictly conserved residues are shaded red, conservative substitutions are shaded orange and less conserved residues are shaded yellow. The two conserved residues (S<sub>433</sub> and R<sub>619</sub>) proposed to be important for the decarboxylation step are shaded green.
